# Supplementary material for: Facilitators & barriers to organic waste and phosphorus re-use in Montreal
Source: Oxford University Press journal article supplement (doi:10.12952/journal.elementa.000070), 2015-01-01
Supplement: elementa_000070_s001.docx [file elementa_000070_s001.docx]

**Text S1. Interview scripts**

**ENGLISH**

**1.What do you view as facilitators and motivators to composting in Montreal?**

prompts:

1. Are there factors/elements that motivate you to compost or use compost (including vermicompost, city compost, homemade compost, organization compost, BRF, leave residues on soil)?
2. Are there existing things (policies, habits, infrastructure) in Montreal, your neighborhood, or your house that make it easier to compost?

**2.What do you view as barriers to composting in Montreal?**

prompts:

1. Are there factors/elements that deter you or make you not want to compost or use certain types of compost?
2. Are there factors/elements/conditions that you think are stopping Montreal as a city, your neighborhood, or you from composting or reusing waste more?

Additional prompts:

1. What role do you think UA could play in composting, if any?
2. Do you think the city of Montreal has a role to play? (how do you feel about role of the UA Committee, the SAM, and the City’s composting plan and proposed facilities locations?)
3. What do you consider to be your motivators to participate in gardening, and agricultural and food production activities?
4. What do you consider to be barriers to participate in gardening, and agricultural and food production activities?
5. What do you consider to be the reasons for why solid organic waste is managed in this way?
6. What do you consider to be benefits for how solid waste is currently managed?
7. What do you consider to drawbacks or problems with the way solid waste is managed?
8. What do you think are barriers to changing the way solid waste is managed?

**FRANÇAIS**

**1. Y a-t-il des facteurs/éléments, que vous estimez, facilitent, ou motivent, le compostage à Montréal ? Si oui quels sont-ils?**

Suivit/piste :

1. Y a-t-il des facteurs /éléments qui vous motivent à composter et à utiliser du compost (y compris le lombricompost, compost de la ville, compost maison, compost collectif, BRF, ou laisser des résidus sur le sol)?
2. Y a-t-il des choses à Montréal, dans votre quartier, ou dans votre maison, qui font qu'il est plus facile de composter?

**2. Y a-t-il des facteurs/éléments, que vous estimez, dissuadent, ou rendent difficile, le compostage ou l’utilisation du compost à Montréal? Si oui quels sont-ils?**

Suivit/piste :

1. Y a-t-il des facteurs /éléments qui vous dissuadent de composter, ou d’utiliser du compost en général ou de type particulier?
2. 2. Y a-t-il des facteurs /éléments /conditions que vous pensez empêche Montréal en tant que ville, votre quartier, ou vous à la maison de composter et de recycler les déchets de façons plus importantes?

Autres:

1. Quel rôle pensez-vous que l’agriculture urbaine pourrait jouer dans le compostage, s’il y en a un?
2. Pensez-vous que la ville de Montréal a un rôle à jouer? (Comment vous sentez-vous par rapport au comité permanent sur l’AU de la Ville, le plan SAM, et le plan de la ville pour le compostage centraliser et l’emplacement des installations?)
3. Qu'est-ce que vous considérez comme votre motivation pour votre participation dans le jardinage, et la production agricole et alimentaire?
4. Qu'est-ce que vous considérez comme des obstacles à votre participation dans le jardinage, et la production agricole et alimentaire?
5. Que considérez-vous comme les raisons pour lesquelles les déchets organiques solides sont gérés de la façon dont ils le sont en ce moment?
6. Qu'est-ce que vous considérez comme les avantages de la gestion courante des déchets organiques/solides ?
7. Que considérez-vous sont les problèmes ou les désavantages de la gestion courante des déchets organiques ?
8. Quels sont les obstacles pour changer la façon dont les déchets organiques sont gérés?
