# Supplementary material for: Facilitators & barriers to organic waste and phosphorus re-use in Montreal
Source: Oxford University Press journal article supplement (doi:10.12952/journal.elementa.000070), 2015-01-01
Supplement: elementa_000070_s002.docx [file elementa_000070_s002.docx]

**Table S1. Occurrence of themes related to Montreal’s facilitators and barriers to composting in interviews**

| Interview Codesa | Compost Processing/ Production | Compost Quality | Compost Use | Data & Monitoring | Ease/Habit | Knowledge Integration | Laws & Rules | Negatives Of Landfills | Organic Matter Collection | **Perceptions of Organic Waste** | *Pollutant (Negative)* | *Resource (Positive)* | Political Priorities/ Will | **Roles & Responsibilities Of Actors** | *Boroughs* | *Environmental Organizations* | *Individual citizens* | *Private Companies* | *Trust* | *Central Government* | Space/ Density | Urban Agriculture As A Catalyst | Totalc |
| --- | --- | --- | --- | --- | --- | --- | --- | --- | --- | --- | --- | --- | --- | --- | --- | --- | --- | --- | --- | --- | --- | --- | --- |
| i1 | 7 | 17 | 4 |  | 3 | 3 |  | 2 | 5 | 2 | 1 | 1 |  | 12 |  | 1 | 4 | 5 |  | 3 | 1 |  | 72 |
| i2 |  |  |  |  | 5 | 2 | 1 | 1 | 16 | 5 | 4 | 2 |  | 5 |  |  | 2 |  |  | 3 | 3 | 1 | 50 |
| i3 | 5 |  | 1 |  | 10 | 8 | 2 |  | 10 | 9 | 5 | 4 |  | 8 | 2 | 6 | 1 |  |  | 1 | 3 |  | 76 |
| i4 | 7 |  | 3 |  |  | 3 | 1 |  | 1 | 1 | 1 | 1 |  | 4 | 1 | 1 | 3 |  |  |  | 1 | 1 | 31 |
| i5 | 4 | 4 | 8 | 2 | 6 | 10 | 1 |  | 2 | 6 | 3 | 3 | 1 | 14 | 5 | 4 | 1 | 1 | 2 | 6 | 2 | 2 | 89 |
| i6 | 4 | 1 | 1 |  | 1 | 3 |  |  |  | 1 |  | 1 |  | 2 |  | 1 |  |  |  | 2 | 2 | 1 | 20 |
| i7 | 3 | 1 | 1 |  | 3 | 5 |  |  | 1 | 1 | 1 |  |  | 7 | 1 | 3 | 1 |  |  | 3 | 1 |  | 32 |
| i8 | 7 | 6 | 4 | 4 | 7 | 5 | 3 |  | 6 | 3 | 2 | 1 | 2 | 12 | 3 | 1 | 3 | 1 |  | 6 | 1 |  | 78 |
| i9 | 10 | 2 | 2 |  | 8 | 4 |  | 1 | 5 | 3 | 1 | 2 | 1 | 5 | 1 | 2 | 4 | 1 |  | 4 | 4 | 3 | 63 |
| i10 |  | 1 | 2 |  | 10 |  | 2 |  | 1 |  |  |  |  | 2 |  |  |  |  |  |  | 1 |  | 19 |
| i11 | 5 | 1 | 2 | 2 | 1 | 4 |  | 1 |  | 2 | 1 | 1 |  | 3 |  |  |  | 1 |  | 3 | 4 |  | 31 |
| i12 & i13 | 9 | 2 | 2 |  | 1 |  | 3 |  | 7 | 3 | 2 | 2 | 1 | 10 | 2 |  |  |  |  | 10 | 4 |  | 58 |
| i14 | 6 |  | 3 | 1 | 1 | 3 | 1 |  | 1 | 3 | 1 | 2 |  | 11 |  | 2 | 2 | 2 | 1 | 6 | 1 | 2 | 50 |
| i15 | 5 | 5 | 9 | 1 | 2 | 3 | 2 | 2 |  | 6 | 2 | 4 | 2 | 15 | 1 |  | 7 |  |  | 10 | 7 |  | 83 |
| i16 | 9 | 3 | 2 | 2 | 3 | 5 |  | 1 | 6 | 6 | 2 | 4 | 3 | 9 | 1 | 4 | 4 | 2 |  | 5 | 2 | 2 | 75 |
| i17 | 6 | 3 | 1 |  | 4 | 3 |  |  |  | 2 | 1 | 2 |  | 6 | 2 | 4 | 3 |  |  | 1 | 2 |  | 41 |
| i18 | 7 | 3 | 4 | 3 | 2 | 9 |  |  | 5 | 1 |  | 1 |  | 8 | 1 | 2 | 1 |  | 2 | 5 | 1 | 2 | 57 |
| i19 | 3 | 5 | 3 | 2 | 4 | 1 |  | 1 | 2 | 8 | 5 | 6 | 1 | 6 | 2 | 1 |  | 1 | 1 | 1 | 4 | 2 | 60 |
| Totalb | 97 | 54 | 52 | 17 | 71 | 71 | 16 | 9 | 68 | 62 | 32 | 37 | 11 | 139 | 22 | 32 | 36 | 14 | 6 | 69 | 44 | 16 |  |

**a** Interview codes (one unique code for each interview conducted) are on the y-axis and interview themes are on the x-axis where bold themes indicate that there are subthemes (and these subthemes follow in italic).

b The total at the bottom of each column indicates the total number of times a theme occurred.

c The total at the end of each row indicates the number of times all themes combined were applied to an interview.
